# Supplementary material for: Molecular dynamics simulations of a hydrophilic MIL-160-based membrane demonstrate pressure-dependent selective uptake of industrially relevant greenhouse gases
Source: Royal Society of Chemistry journal article supplement (doi:10.1039/d1ma00468a), 2021-01-01
Supplement: d1ma00468a1.pdf [file d1ma00468a1.pdf]

## Supporting Information:

### Molecular dynamics simulations probe greenhouse gas sorption capabilities of metal organic framework-based membrane for efficient gas separation processes

Jordan Chapman<sup>1</sup>, Nagasree Garapati<sup>1</sup>, Vassiliki-Alexandra Glezakou<sup>2</sup>, Yuhua Duan<sup>3</sup>, Jianli Hu<sup>a</sup>  
and Cerasela Zoica Dinu<sup>1,\*</sup>

<sup>1</sup>Department of Chemical and Biomedical Engineering, West Virginia University, Morgantown, West Virginia 26506, United States

<sup>2</sup>Basic/Applied Molecular Found, Pacific Northwest National Laboratory, Richland, WA 99352, United States

<sup>3</sup>National Energy Technology Laboratory, United States Department of Energy, Pittsburgh, Pennsylvania 15236, United States

### Table of Contents

|                                                                                                                                                                                                                                          |    |
|------------------------------------------------------------------------------------------------------------------------------------------------------------------------------------------------------------------------------------------|----|
| <b>Table S.1:</b> varied simulation pressures corresponded to respective number of molecules in single-component gas baths as well as simulation box dimensions required to achieve target pressure calculated for ideal gas conditions. | 3  |
| <b>Table S.2:</b> varied simulation pressures corresponded to respective number of molecules in gas mixture baths as well as simulation box dimensions required to achieve target pressure calculated for ideal gas conditions.          | 3  |
| <b>Fig. S.1:</b> schematic representation of gas permeation simulations at initial configurations                                                                                                                                        | 2  |
| <b>Fig. S.2:</b> permeation and sorption profiles of CO <sub>2</sub>                                                                                                                                                                     | 4  |
| <b>Fig. S.3:</b> permeation and sorption profiles of CH <sub>4</sub> .                                                                                                                                                                   | 5  |
| <b>Fig. S.4:</b> permeation and sorption profiles of SO <sub>2</sub>                                                                                                                                                                     | 6  |
| <b>Fig. S.5:</b> permeation and sorption profiles of NO <sub>2</sub> .                                                                                                                                                                   | 7  |
| <b>Fig. S.6:</b> permeation and sorption profiles of NO.                                                                                                                                                                                 | 8  |
| <b>Fig. S.7:</b> permeation and sorption profiles of CO <sub>2</sub> and CH <sub>4</sub>                                                                                                                                                 | 9  |
| <b>Fig. S.8:</b> permeation and sorption profiles of CO <sub>2</sub> and SO <sub>2</sub>                                                                                                                                                 | 10 |
| <b>Fig. S.9:</b> permeation and sorption profiles of CO <sub>2</sub> and NO <sub>2</sub>                                                                                                                                                 | 11 |
| <b>Fig. S.10:</b> permeation and sorption profiles of CO <sub>2</sub> and NO.                                                                                                                                                            | 12 |



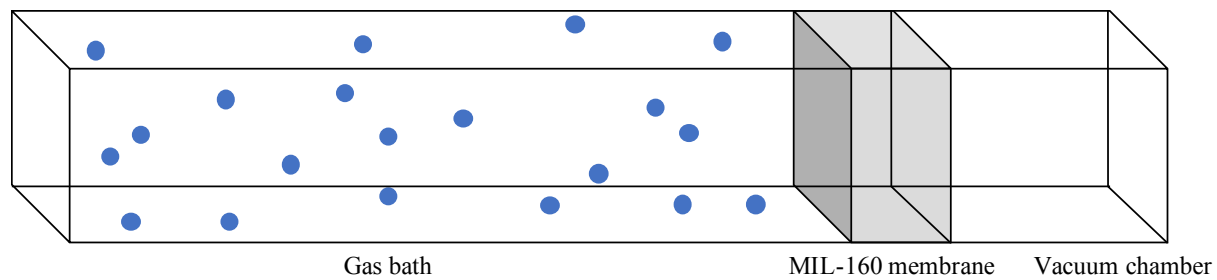

**Figure S.1:** schematic representation of gas permeation simulations at initial configurations in which a 4 x 4 x 3 MIL-160 membrane separates a gas bath from a vacuum chamber.

**Tables:****Table S.1:** varied simulation pressures corresponded to respective number of molecules in single-component gas baths as well as simulation box dimensions required to achieve target pressure calculated for ideal gas conditions.

| Simulation pressure (bar) | Number of molecules | X-direction length (nm) | Y-direction length (nm) | Z-direction length (nm) | Simulation box volume (nm <sup>3</sup> ) |
|---------------------------|---------------------|-------------------------|-------------------------|-------------------------|------------------------------------------|
| 0.2                       | 20                  | 8.4                     | 8.4                     | 68.1                    | 4,805                                    |
| 0.5                       | 50                  | 8.4                     | 8.4                     | 68.1                    | 4,805                                    |
| 1                         | 100                 | 8.4                     | 8.4                     | 68.1                    | 4,805                                    |
| 5                         | 500                 | 8.4                     | 8.4                     | 68.1                    | 4,805                                    |
| 50                        | 500                 | 8.4                     | 8.4                     | 15.1                    | 1,065                                    |

**Table S.2:** varied simulation pressures corresponded to respective number of molecules in gas mixture baths as well as simulation box dimensions required to achieve target pressure calculated for ideal gas conditions.

| Simulation pressure (bar) | Number of CO <sub>2</sub> molecules | Number of balance molecules | X-direction length (nm) | Y-direction length (nm) | Z-direction length (nm) | Simulation box volume (nm <sup>3</sup> ) |
|---------------------------|-------------------------------------|-----------------------------|-------------------------|-------------------------|-------------------------|------------------------------------------|
| 0.2                       | 1                                   | 19                          | 8.4                     | 8.4                     | 68.1                    | 4,805                                    |
| 0.5                       | 2                                   | 48                          | 8.4                     | 8.4                     | 68.1                    | 4,805                                    |
| 1                         | 5                                   | 95                          | 8.4                     | 8.4                     | 68.1                    | 4,805                                    |
| 5                         | 25                                  | 475                         | 8.4                     | 8.4                     | 68.1                    | 4,805                                    |
| 50                        | 25                                  | 475                         | 8.4                     | 8.4                     | 15.1                    | 1,065                                    |

Figures and Figure captions:

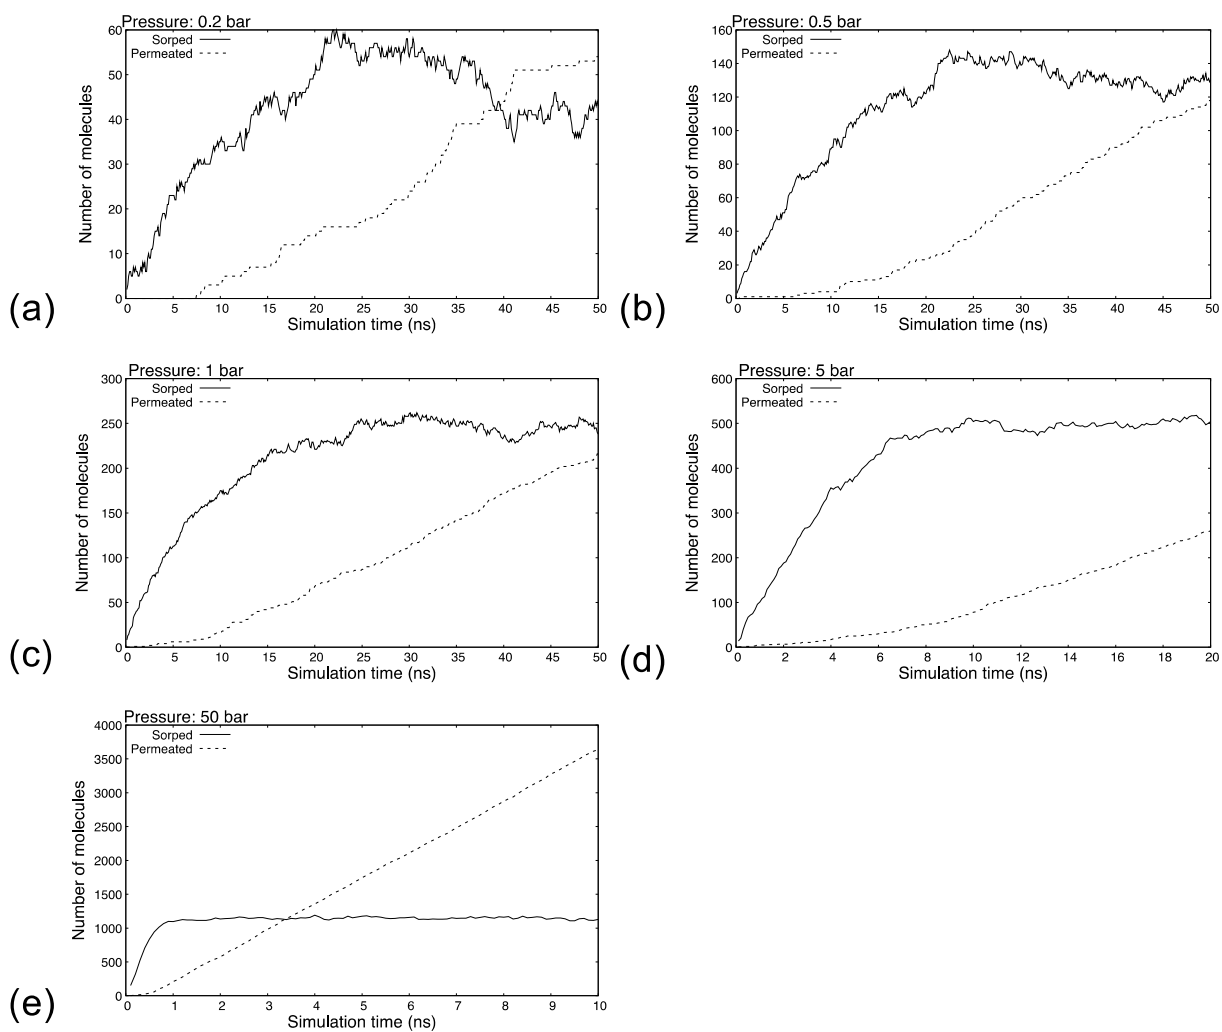

**Figure S.2:** permeation and sorption profiles of CO<sub>2</sub> at (a) 0.2 bar, (b) 0.5 bar, (c) 1 bar, (d) 5 bar, and (e) 50 bar with respect to a rigid 4 x 4 x 3 MIL-160 membrane.

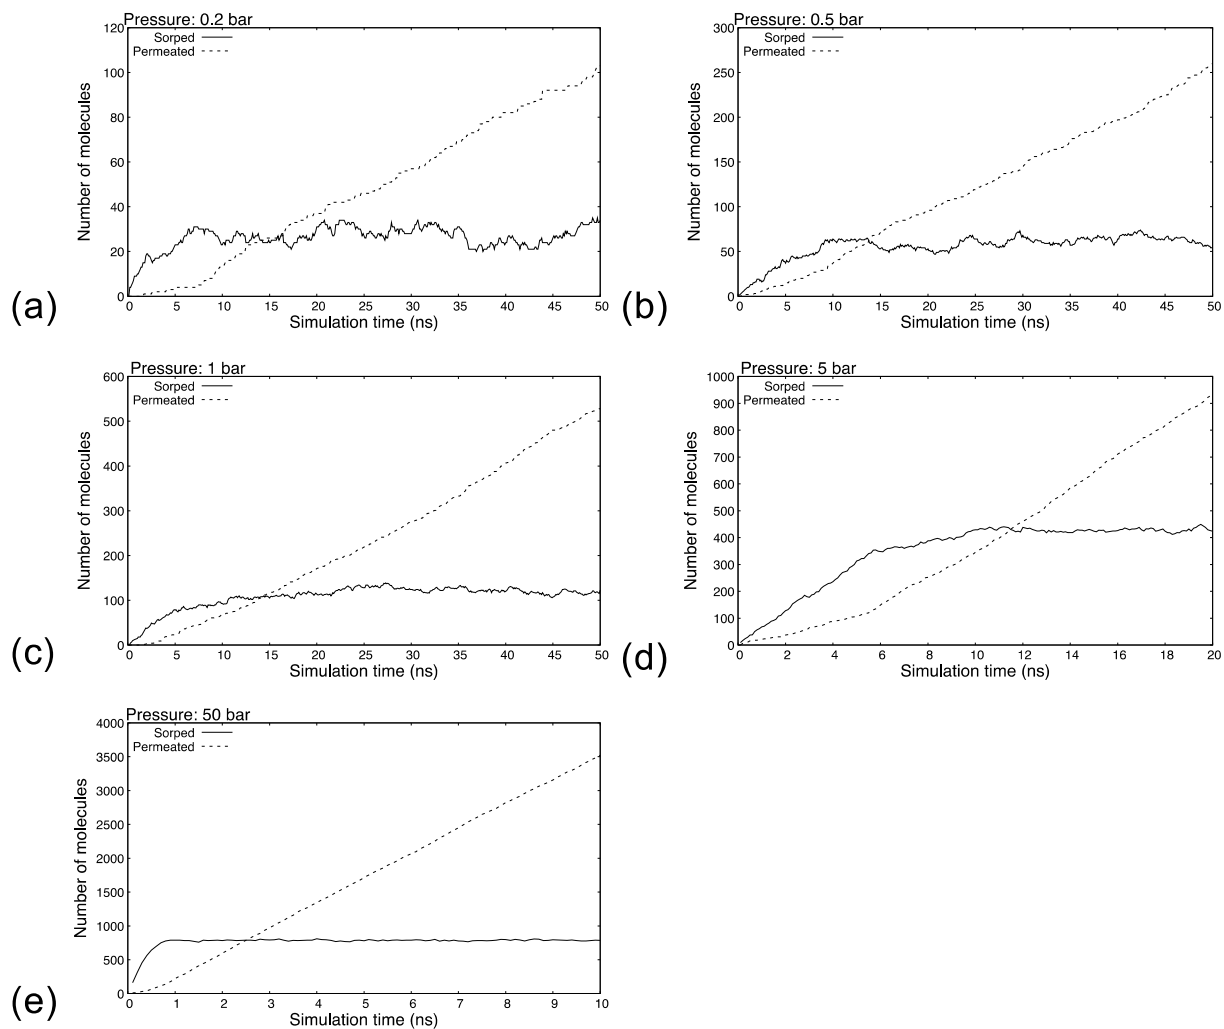

**Figure S.3:** permeation and sorption profiles of CH<sub>4</sub> at (a) 0.2 bar, (b) 0.5 bar, (c) 1 bar, (d) 5 bar, and (e) 50 bar with respect to a rigid 4 x 4 x 3 MIL-160 membrane.

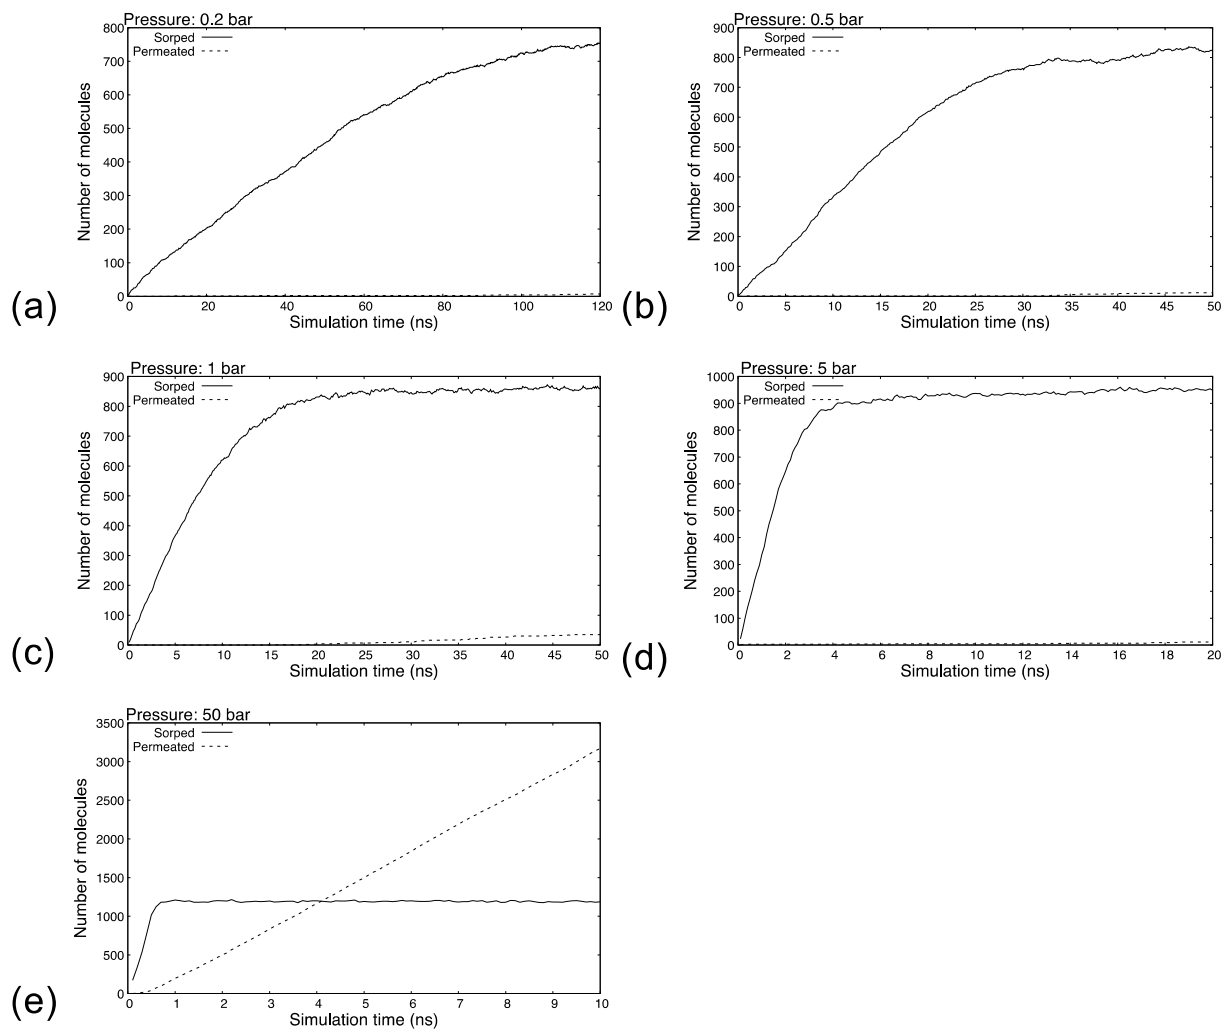

**Figure S.4:** permeation and sorption profiles of SO<sub>2</sub> at (a) 0.2 bar, (b) 0.5 bar, (c) 1 bar, (d) 5 bar, and (e) 50 bar with respect to a rigid 4 x 4 x 3 MIL-160 membrane.

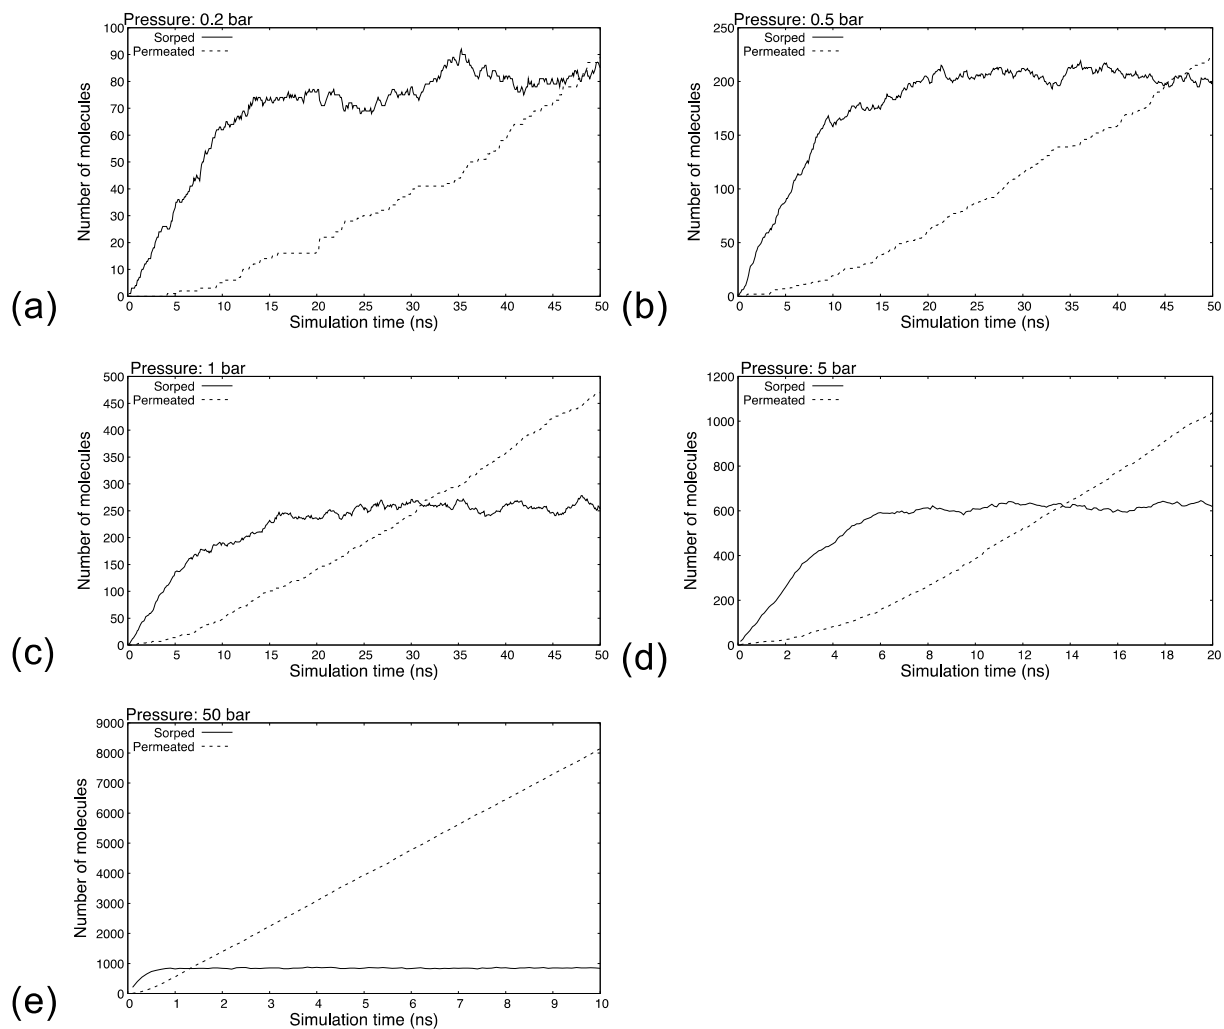

**Figure S.5:** permeation and sorption profiles of NO<sub>2</sub> at (a) 0.2 bar, (b) 0.5 bar, (c) 1 bar, (d) 5 bar, and (e) 50 bar with respect to a rigid 4 x 4 x 3 MIL-160 membrane.



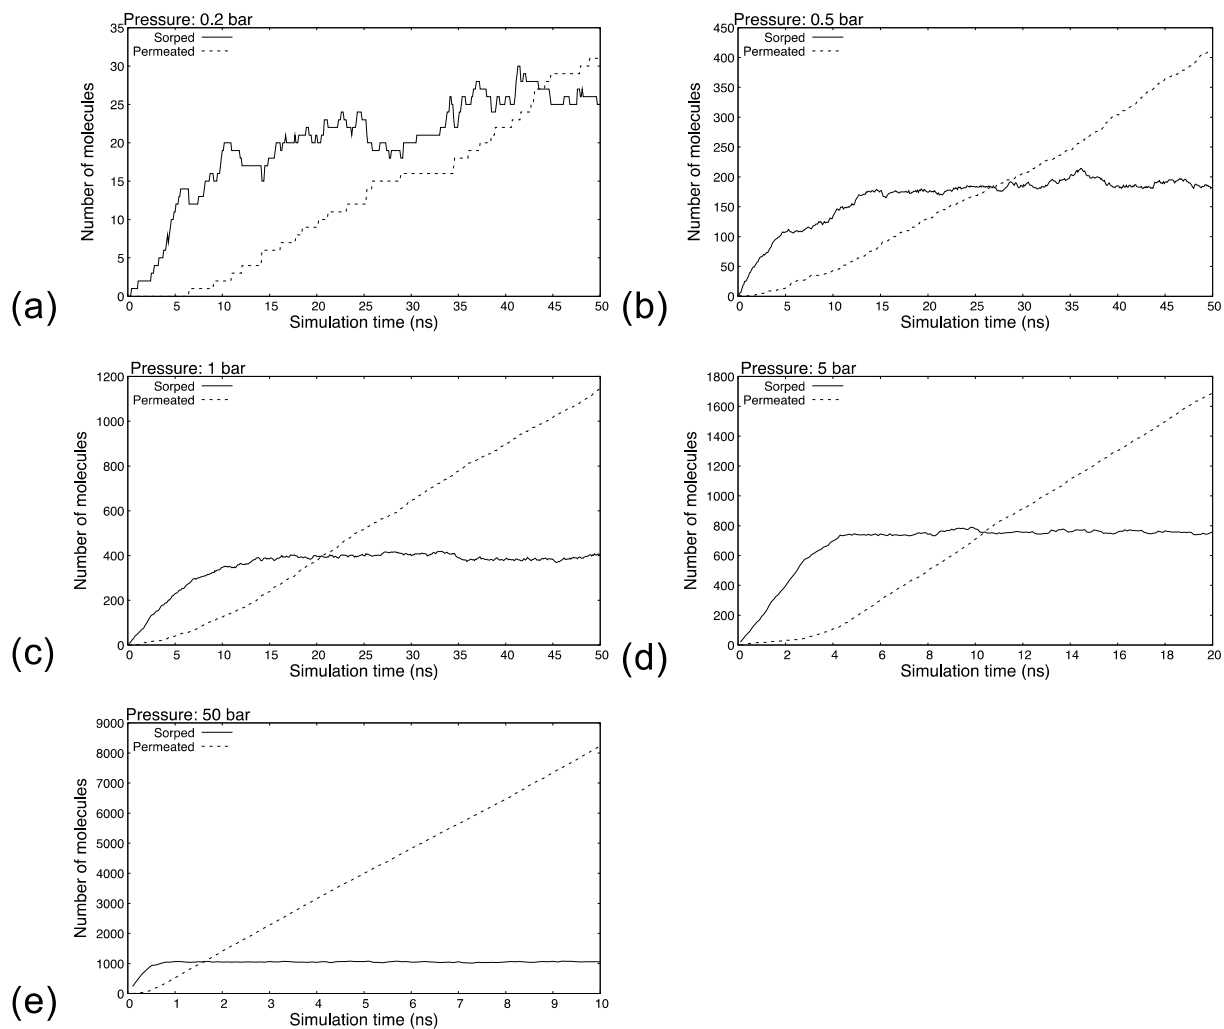

**Figure S.6:** permeation and sorption profiles of NO at (a) 0.2 bar, (b) 0.5 bar, (c) 1 bar, (d) 5 bar, and (e) 50 bar with respect to a rigid 4 x 4 x 3 MIL-160 membrane.

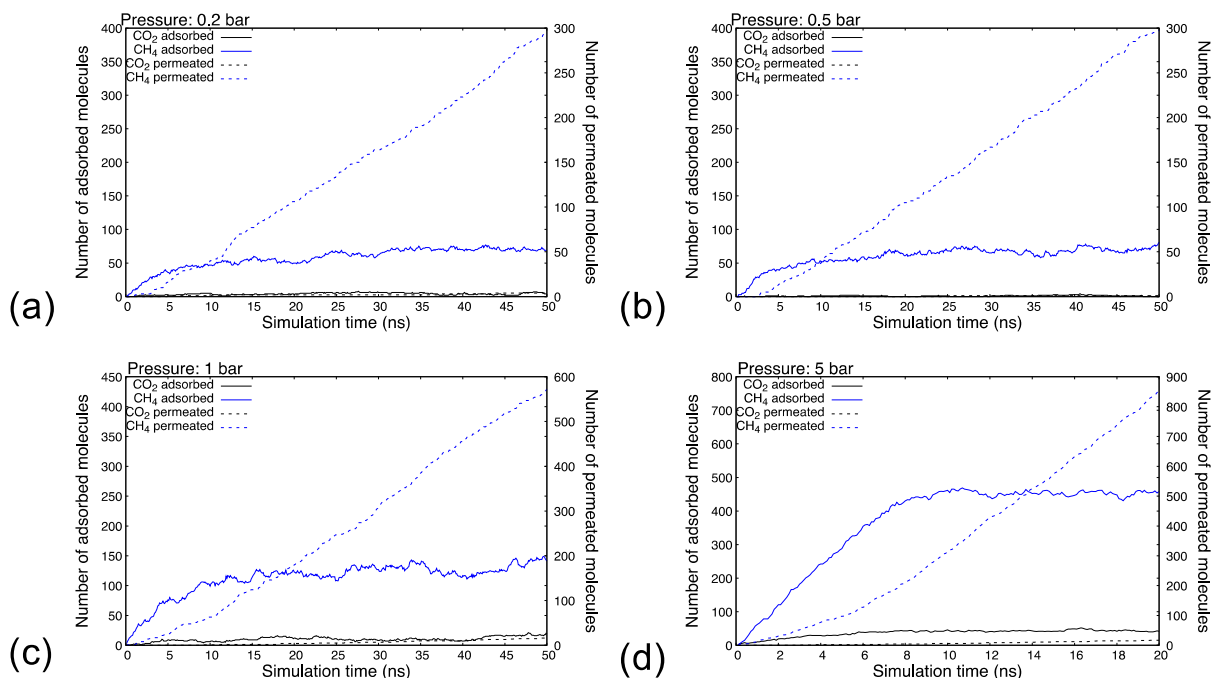

**Figure S.7:** permeation (dashed line) and sorption (solid line) profiles of CO<sub>2</sub> (black) and CH<sub>4</sub> (blue) at (a) 0.2 bar, (b) 0.5 bar, (c) 1 bar, and (d) 5 bar with respect to a rigid 4 x 4 x 3 MIL-160 membrane.

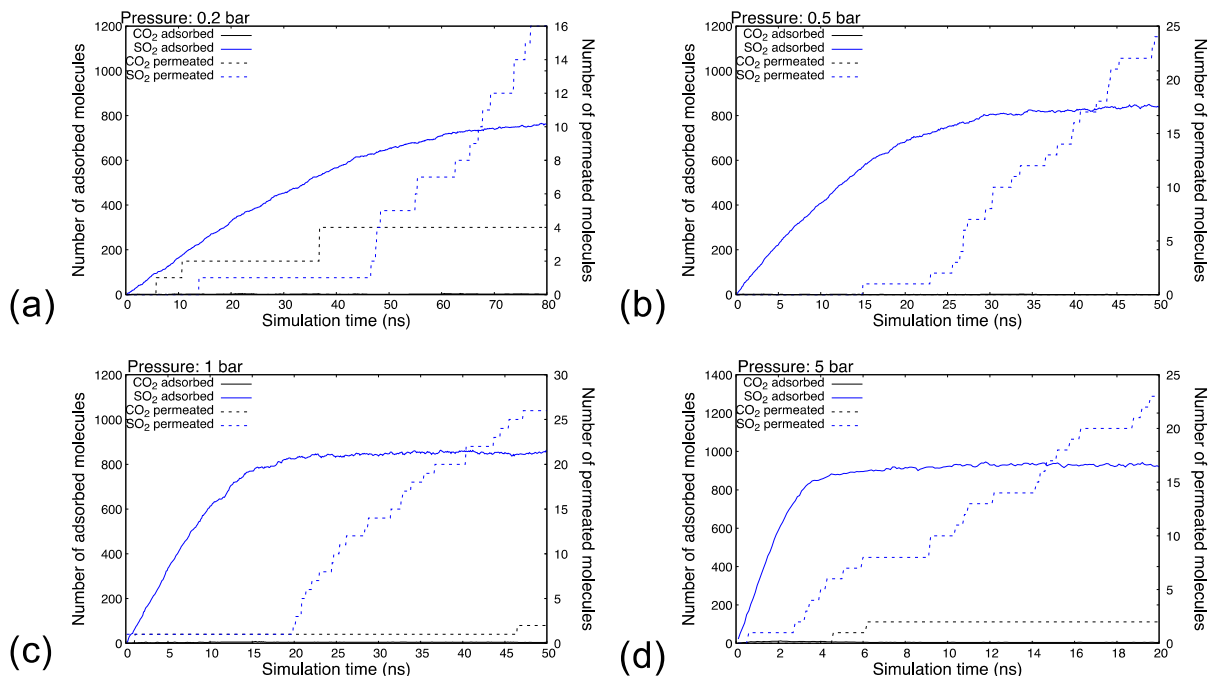

**Figure S.8:** permeation (dashed line) and sorption (solid line) profiles of CO<sub>2</sub> (black) and SO<sub>2</sub> (blue) at (a) 0.2 bar, (b) 0.5 bar, (c) 1 bar, and (d) 5 bar with respect to a rigid 4 x 4 x 3 MIL-160 membrane.

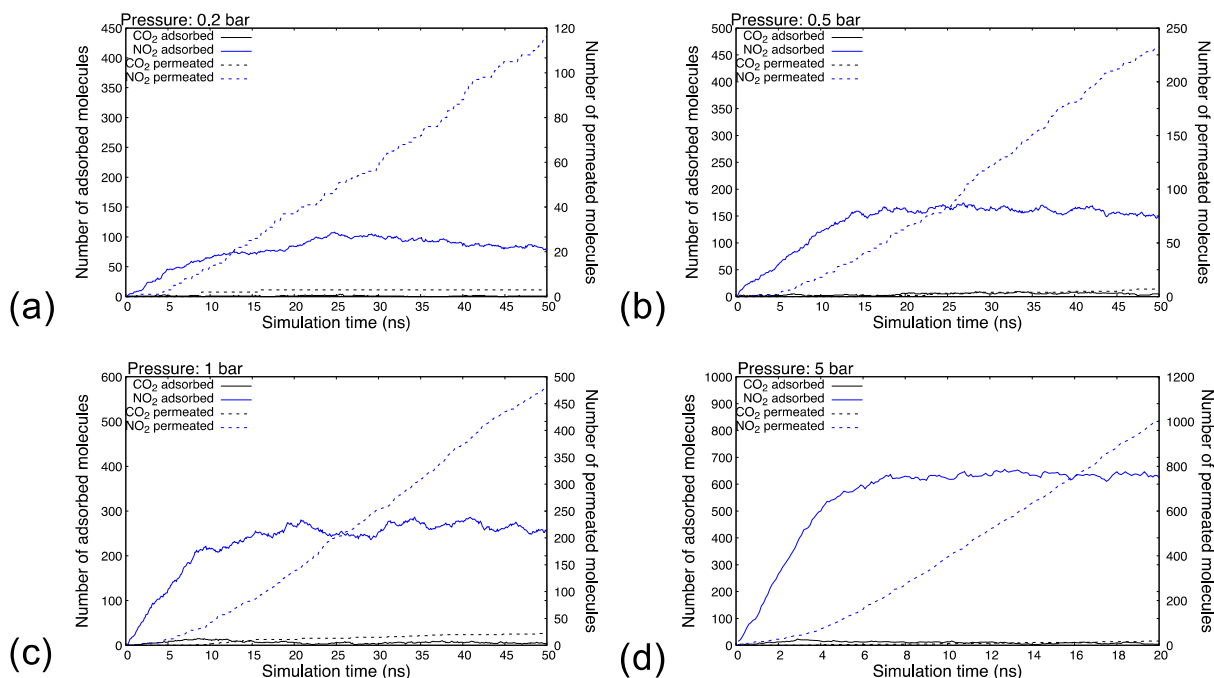

**Figure S.9:** permeation (dashed line) and sorption (solid line) profiles of CO<sub>2</sub> (black) and NO<sub>2</sub> (blue) at (a) 0.2 bar, (b) 0.5 bar, (c) 1 bar, and (d) 5 bar with respect to a rigid 4 x 4 x 3 MIL-160 membrane.

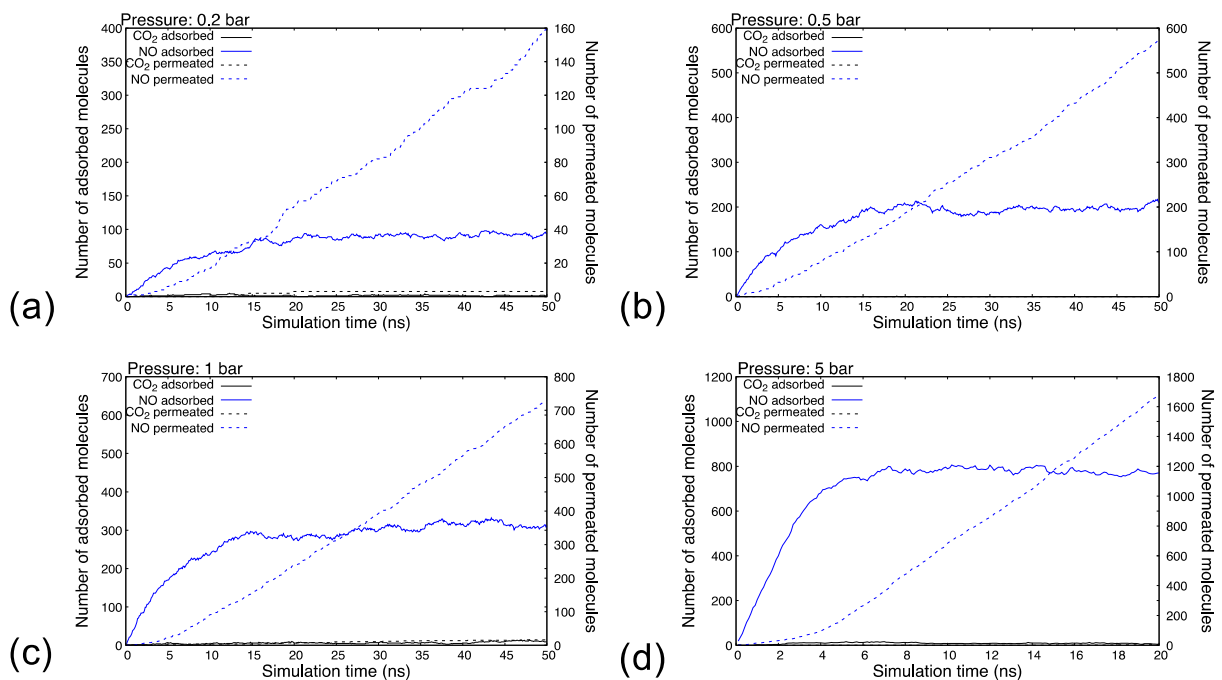

**Figure S.10:** permeation (dashed line) and sorption (solid line) profiles of CO<sub>2</sub> (black) and NO (blue) at (a) 0.2 bar, (b) 0.5 bar, (c) 1 bar, and (d) 5 bar with respect to a rigid 4 x 4 x 3 MIL-160 membrane.
